# Supplementary material for: Immunogenicity evaluation of MS2 phage-mediated chimeric nanoparticle displaying an immunodominant B cell epitope of foot-and-mouth disease virus
Source: PeerJ. 2018 May 23;6:e4823. doi: 10.7717/peerj.4823 (PMC5970553; doi:10.7717/peerj.4823)
Supplement: Supplemental Information 1 — Mice were immunized with PepVac, CNPs, TRE and PBS respectively. Mice sera were collected every week after immunization and used to detect the specific antibodies against inactivated FMDV by ELISA. [file peerj-06-4823-s001.xlsx]

## Sheet: Sheet1
Treatment	Absorbance values at 450 nm (day of post-immunizaion)
	0d					7d					14d					21d					28d					35d					42d					49d					56d
PBS	0.099	0.152	0.134	0.128	0.117	0.109	0.125	0.164	0.117	0.125	0.117	0.104	0.089	0.126	0.113	0.137	0.111	0.091	0.099	0.224	0.211	0.136	0.098	0.167	0.108	0.207	0.144	0.166	0.177	0.207	0.116	0.129	0.108	0.093	0.123	0.094	0.203	0.105	0.217	0.115	0.115	0.121	0.098	0.118	0.234
PepVac	0.105	0.154	0.106	0.132	0.089	0.302	0.269	0.244	0.365	0.281	0.517	0.491	0.503	0.611	0.363	0.769	0.833	0.619	0.739	0.451	1.023	0.996	0.856	0.938	0.678	1.304	1.268	0.869	1.405	0.712	1.469	1.582	0.926	1.556	0.836	1.555	1.644	1.324	1.605	0.891	1.642	1.627	1.425	1.625	1.002
CNPs	0.128	0.201	0.119	0.104	0.126	0.241	0.209	0.217	0.302	0.235	0.636	0.394	0.702	0.618	0.688	0.803	0.445	0.877	0.854	0.905	1.214	0.654	1.258	1.304	1.009	1.428	0.735	1.509	1.439	1.387	1.672	0.845	1.738	1.636	1.562	1.811	0.899	1.883	1.804	1.665	1.924	1.001	1.902	1.875	1.913
TRE	0.2	0.162	0.093	0.151	0.144	0.213	0.187	0.273	0.231	0.256	0.345	0.405	0.363	0.344	0.407	0.558	0.618	0.442	0.589	0.633	0.768	0.813	0.467	0.861	0.807	1.008	0.986	0.504	1.114	1.052	1.214	1.024	0.534	1.197	1.207	1.432	1.537	0.667	1.281	1.308	1.362	1.458	0.637	1.347	1.328

## Sheet: od,7weeks,14weeks,21weeks
User: USER			Path: D:\BMG\Data\Data\							Test ID: 30
Test Name: wgq								Date: 2017/8/4		Time: 14:20:52
Absorbance			Absorbance values are displayed as OD
	Raw Data (450)
	1	2	3	4	5	6	7	8	9	10	11	12
A	0.099	0.152	0.134	0.128	0.117	0.109	0.125	0.164	0.117	0.125	0.007	0.003
B	0.105	0.154	0.106	0.132	0.089	0.302	0.269	0.244	0.365	0.281	0.001	0.004
C	0.128	0.201	0.119	0.104	0.126	0.241	0.209	0.217	0.302	0.235	0.003	0.002
D	0.2	0.162	0.093	0.151	0.144	0.213	0.187	0.273	0.231	0.256	0.002	0.008
E	0.117	0.104	0.089	0.126	0.113	0.137	0.111	0.091	0.099	0.224	0.005	0.004
F	0.517	0.491	0.503	0.611	0.363	0.769	0.833	0.619	0.739	0.451	0.008	0.005
G	0.636	0.394	0.702	0.618	0.688	0.803	0.445	0.877	0.854	0.905	0.004	0.004
H	0.345	0.405	0.363	0.344	0.407	0.558	0.618	0.442	0.589	0.633	0.004	0.001
		1	2	3	4	5	6	7	8	9	10	11	12
A	PBS	0d,28d or 56d					7d or 35d					BLANK
B	PepVac
C	CNPs
D	TRE
E	PBS	14d or 42d					21d or 42d
F	PepVac
G	CNPs
H	TRE

## Sheet: 28d,35d,42d,49d
User: USER			Path: D:\BMG\Data\Data\							Test ID: 31
Test Name: wgq								Date: 2017/8/4		Time: 14:23:21
Absorbance			Absorbance values are displayed as OD
	Raw Data (450)
	1	2	3	4	5	6	7	8	9	10	11	12
A	0.211	0.136	0.098	0.167	0.108	0.207	0.144	0.166	0.177	0.207	0.005	0.007
B	1.023	0.996	0.856	0.938	0.678	1.304	1.268	0.869	1.405	0.712	0.004	0.008
C	1.214	0.654	1.258	1.304	1.009	1.428	0.735	1.509	1.439	1.387	0.002	0.01
D	0.768	0.813	0.467	0.861	0.807	1.008	0.986	0.504	1.114	1.052	0.005	0.004
E	0.116	0.129	0.108	0.093	0.123	0.094	0.203	0.105	0.217	0.115	0.004	0.001
F	1.469	1.582	0.926	1.556	0.836	1.555	1.644	1.324	1.605	0.891	0.001	0.003
G	1.672	0.845	1.738	1.636	1.562	1.811	0.899	1.883	1.804	1.665	0.006	0.005
H	1.214	1.024	0.534	1.197	1.207	1.432	1.537	0.667	1.281	1.308	0.003	0.004

## Sheet: 56d
User: USER			Path: D:\BMG\Data\Data\							Test ID: 32
Test Name: wgq								Date: 2017/8/4		Time: 14:26:45
Absorbance			Absorbance values are displayed as OD
	Raw Data (450)
	1	2	3	4	5	6	7	8	9	10	11	12
A	0.115	0.121	0.098	0.118	0.234	0.002	0.001	0.002	0.005	0.001	0.004	0.006
B	1.642	1.627	1.425	1.625	1.002	0.002	0.001	0.006	0.003	0.006	0.001	0.004
C	1.924	1.001	1.902	1.875	1.913	0.003	0.003	0.004	0.003	0.004	0.002	0.001
D	1.362	1.458	0.637	1.347	1.328	0.003	0.003	0.004	0.005	0.002	0.002	0.002
E	0.006	0.004	0.004	0.002	0.006	0.002	0.001	0.002	0.003	0.007	0.003	0.005
F	0.004	0.004	0.005	0.007	0.003	0.002	0.002	0.007	0.004	0.003	0.002	0.003
G	0.002	0.002	0.002	0.004	0.006	0.004	0.003	0.01	0.002	0.001	0.002	0.002
H	0.007	0.007	0.002	0.003	0.001	0.004	0.005	0.011	0.004	0.004	0.003	0.001
